# Supplementary material for: Supercritical solvothermal preparation of a ZnxCd1−xS visible photocatalyst with enhanced activity
Source: Royal Society of Chemistry journal article supplement (doi:10.1039/c4ta04021j), 2014-01-01
Supplement: c4ta04021j1.pdf [file c4ta04021j1.pdf]

# **Supercritical Solvothermal Preparation of $Zn_xCd_{1-x}S$ Visible Photocatalyst with Enhanced Activity**

Jiahui Zhong, Ya Zhang, Changqun Hu, Rujing Hou, Haibo Yin, Hexing Li, and

Yuning Huo\*

*The Education Ministry Key Lab of Resource Chemistry, Shanghai Key Laboratory of  
Rare Earth Functional Materials, Shanghai Normal University, Shanghai 200234, China*

**Supporting Information**

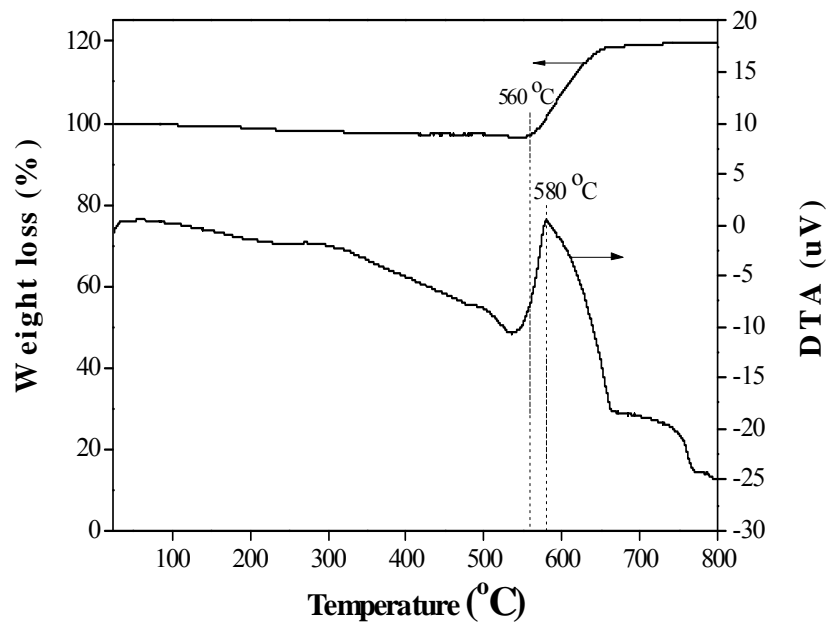

**Fig. S1** TG-DTA curve of  $\text{Zn}_{0.21}\text{Cd}_{0.79}\text{S}$  sample.

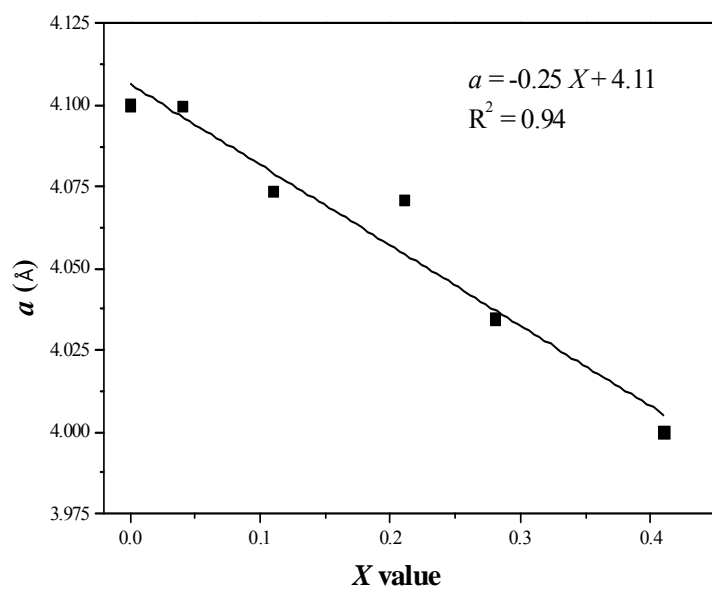

**Fig. S2** Linear relationship of the lattice parameter ( $a$ ) of  $Zn_xCd_{1-x}S$  as a function of  $X$  value.

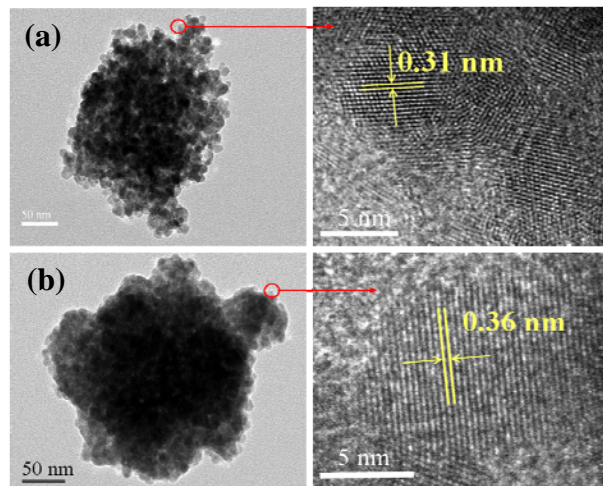

**Fig. S3** TEM and HRTEM images of (a) ZnS and (b) CdS catalysts.

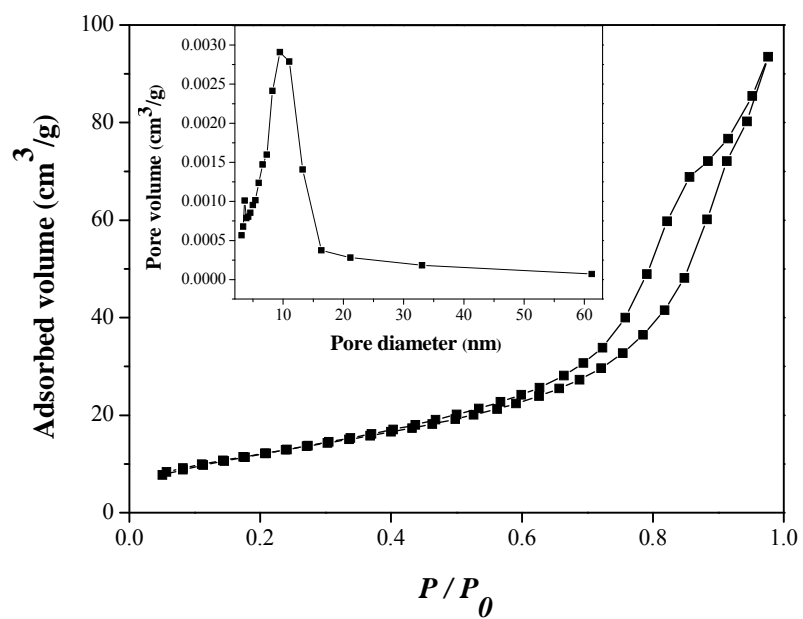

**Fig. S4** N<sub>2</sub> adsorption-desorption isotherm and pore size distribution (insert) of Zn<sub>0.21</sub>Cd<sub>0.79</sub>S sample.

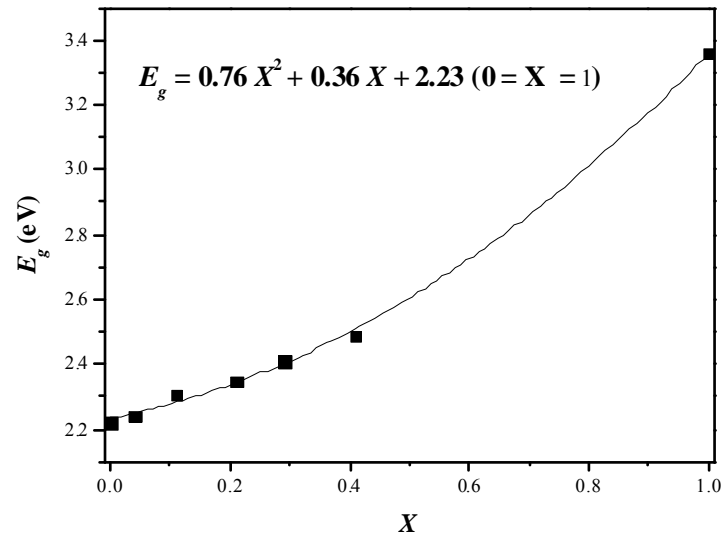

**Fig. S5** Variation of  $E_g$  with  $X$  value.

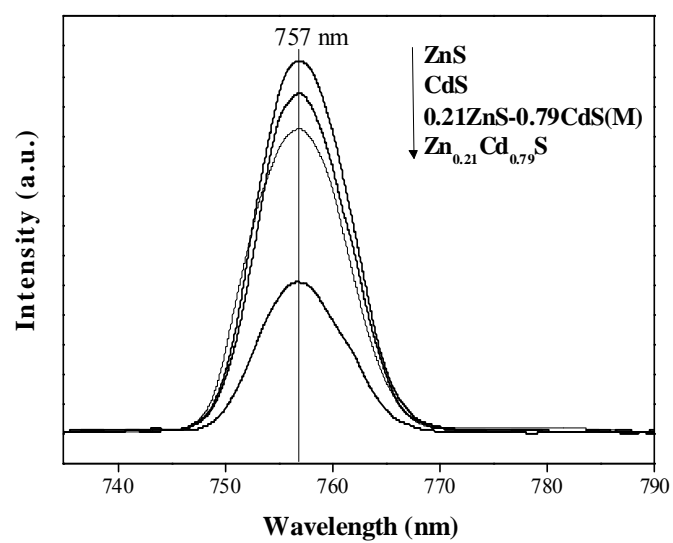

**Fig. S6** PL spectra of different samples. Excitation wavelength = 380 nm.

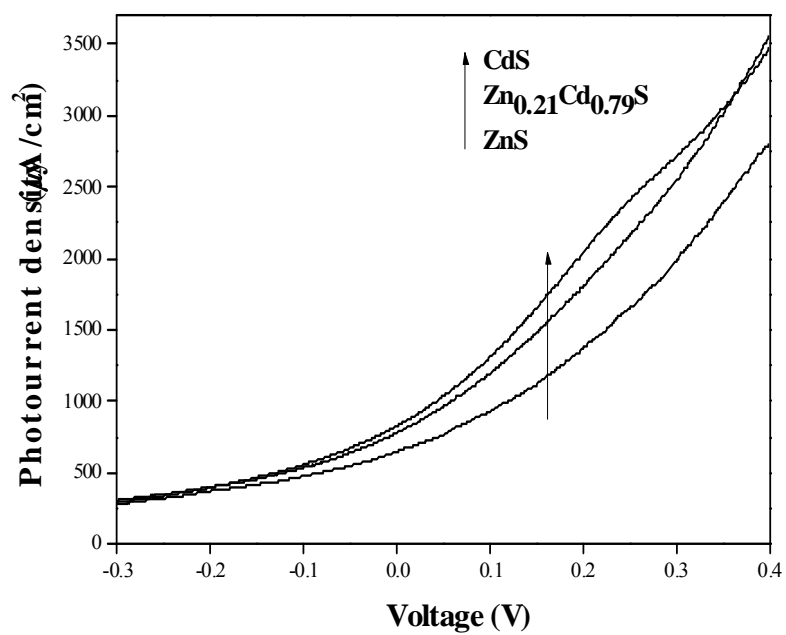

**Fig. S7** Photocurrent response tests of different samples under visible light irradiation (300 W Xe lamp,  $\lambda \geq 400$  nm).



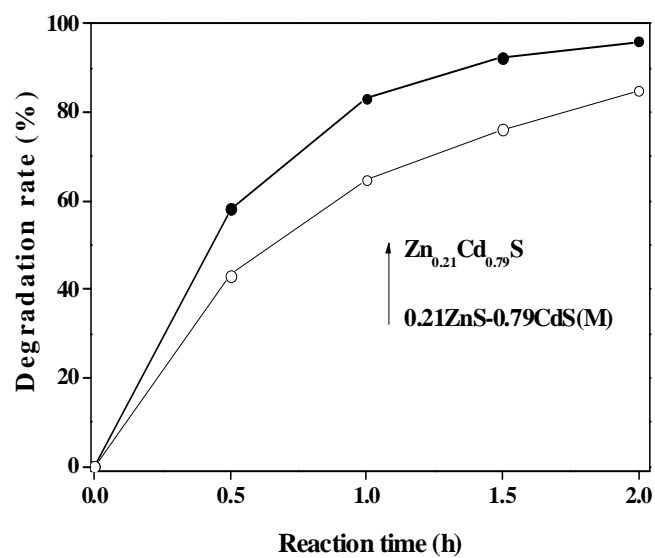

**Fig. S8** RhB photocatalytic degradation on Zn<sub>0.21</sub>Cd<sub>0.79</sub>S and 0.21ZnS-0.79CdS(M).

Reaction conditions were given in Figure 6.

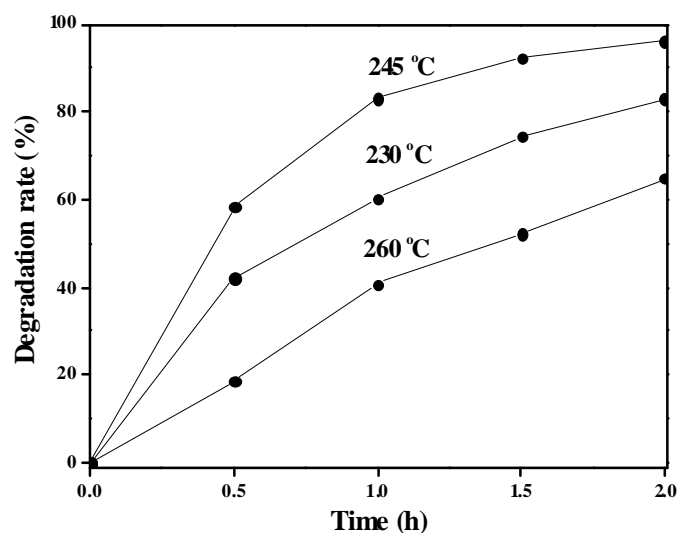

**Fig. S9** RhB photocatalytic degradation on  $\text{Zn}_{0.21}\text{Cd}_{0.79}\text{S}$  samples obtained at different solvothermal temperature. Reaction conditions were given in Figure 6.

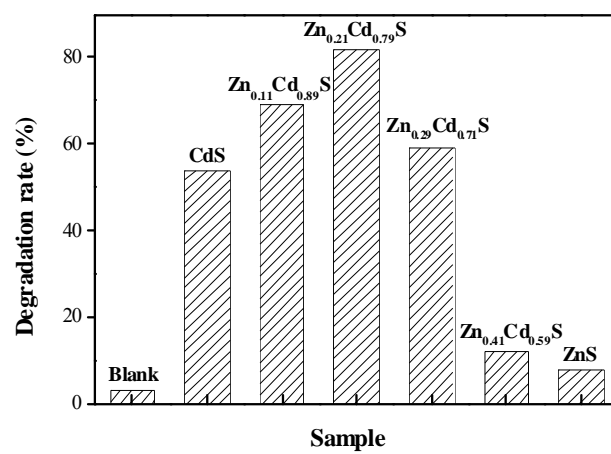

**Fig. S10** 4-CP photocatalytic degradation on different samples. Reaction conditions: 50 mg catalyst, 50 mL 10 mg/L 4-CP solution,  $\lambda \geq 420$  nm,  $T = 30^\circ\text{C}$ , reaction time = 4 h.

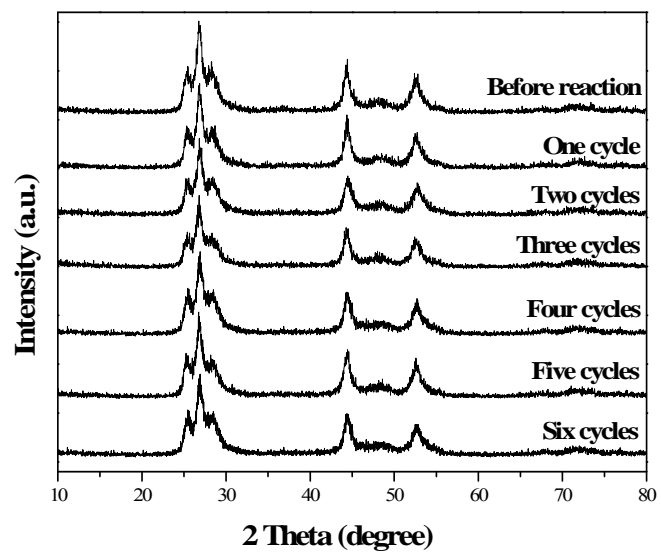

**Fig. S11** XRD patterns of Zn<sub>0.21</sub>Cd<sub>0.79</sub>S photocatalyst after each photocatalytic reaction cycle.
